# Supplementary material for: Circulating microRNAs as Biomarkers of Hepatic Fibrosis in Schistosomiasis Japonica Patients in the Philippines
Source: MDPI journal article supplement (doi:10.3390/diagnostics12081902), 2022-08-05
Supplement: s1 [file s1]

# Supplementary File S1: Ranges adjusted for body weight in Chinese population.

| Body height (cm) | Liver: length of left lobe (mm)                |       |      | Liver: thickness of left lobe (mm) |      |      |
|------------------|------------------------------------------------|-------|------|------------------------------------|------|------|
|                  | N                                              | Mean  | S.D. | N                                  | Mean | S.D. |
| 80–100           | 70                                             | 57.7  | 7.6  | 70                                 | 43.9 | 5.5  |
| 101–120          | 43                                             | 63.1  | 8.0  | 43                                 | 42.6 | 5.4  |
| 121–140          | 71                                             | 62.1  | 8.3  | 71                                 | 46.8 | 7.0  |
| 141–160          | 175                                            | 63.4  | 10.6 | 174                                | 50.5 | 9.5  |
| >160             | 191                                            | 66.6  | 11.1 | 191                                | 53.2 | 9.3  |
| Total            | 550                                            | 63.6  | 10.4 | 549                                | 49.5 | 9.2  |
|                  | Liver: length of right lobe <sup>a</sup> (mm)  |       |      | Main portal vein <sup>b</sup> (mm) |      |      |
| 80–100           | 70                                             | 81.6  | 6.9  | 70                                 | 6.4  | 0.6  |
| 101–120          | 42                                             | 90.8  | 6.3  | 43                                 | 6.7  | 0.5  |
| 121–140          | 71                                             | 105.3 | 7.8  | 69                                 | 7.6  | 1.0  |
| 141–160          | 173                                            | 111.6 | 9.5  | 169                                | 8.6  | 1.4  |
| >160             | 190                                            | 116.1 | 9.1  | 188                                | 9.5  | 1.3  |
| Total            | 546                                            | 106.9 | 14.6 | 539                                | 8.3  | 1.6  |
|                  | Spleen length (mm)                             |       |      | Spleen thickness (mm)              |      |      |
| 80–100           | 70                                             | 61.9  | 8.2  | 70                                 | 19.2 | 2.6  |
| 101–120          | 43                                             | 67.8  | 10.3 | 43                                 | 23.3 | 6.6  |
| 121–140          | 71                                             | 80.4  | 10.7 | 71                                 | 26.3 | 4.3  |
| 141–160          | 174                                            | 86.1  | 14.7 | 175                                | 28.4 | 4.7  |
| >160             | 190                                            | 89.7  | 16.5 | 190                                | 29.1 | 5.9  |
| Total            | 548                                            | 82.1  | 17.0 | 549                                | 26.8 | 6.0  |
|                  | Portal branch wall thickness <sup>c</sup> (mm) |       |      |                                    |      |      |
| 80–100           | 66                                             | 1.3   | 0.4  |                                    |      |      |
| 101–120          | 34                                             | 1.9   | 0.3  |                                    |      |      |
| 121–140          | 71                                             | 2.0   | 0.4  |                                    |      |      |
| 141–160          | 174                                            | 2.2   | 0.6  |                                    |      |      |
| >160             | 190                                            | 2.1   | 0.9  |                                    |      |      |
| Total            | 535                                            | 2.0   | 0.7  |                                    |      |      |

<sup>a</sup> Max oblique diameter.

<sup>b</sup> Inner diameter.

<sup>c</sup> Portal branch wall thickness expressed as external diameter minus diameter of lumen.

## Supplementary Tables

**Supplementary Table S1.** Selected miRNAs based on literature review and initial miRNA profiling.

| miRNA                | Accession #  | Sequences (mature)      |
|----------------------|--------------|-------------------------|
| Pro-fibrotic miRNAs  |              |                         |
| hsa-miR-200b-3p      | MIMAT0000318 | UAAUACUGCCUGGUAAUGAUGA  |
| hsa-miR-93-5p        | MIMAT0000093 | CAAAGUGCUGUUCGUGCAGGUAG |
| Anti-fibrotic miRNAs |              |                         |
| hsa-miR-122-5p       | MIMAT0000421 | UGGAGUGUGACAAUGGUGUUUG  |
| hsa-miR-146a-5p      | MIMAT0000449 | UGAGAACUGAAUUCCAUGGGUU  |
| hsa-miR-150-5p       | MIMAT0000451 | UCUCCCAACCCUUGUACCAGUG  |
| hsa-let-7a-5p        | MIMAT0000062 | UGAGGUAGUAGGUUGUAUAGUU  |

**Supplementary Table S2.** Dynamics of US-detectable hepatic fibrosis severity at baseline and at 6 months after PZQ treatment among the 136 patients enrolled in the cohort.

| Hepatic<br>fibrosis,<br>baseline <sup>1</sup> | Hepatic<br>fibrosis,<br>after 6 months <sup>1</sup> |      |    | Total | Regression<br>of Fibrosis<br>Grade (RF) |      | Progression<br>of Fibrosis<br>Grade (PF) |      | Stable<br>Fibrosis<br>Grade (SF) |       |
|-----------------------------------------------|-----------------------------------------------------|------|----|-------|-----------------------------------------|------|------------------------------------------|------|----------------------------------|-------|
|                                               | T0                                                  | T1/2 | T3 |       | no.                                     | %    | no.                                      | (%)  | no.                              | (%)   |
| T0                                            | 58                                                  | 0    | 0  | 58    | -                                       | -    | 0                                        | 0    | 58                               | 100.0 |
| T1/2                                          | 1                                                   | 30   | 0  | 31    | 1                                       | 3.2  | 0                                        | 0    | 30                               | 96.7  |
| T3                                            | 0                                                   | 0    | 47 | 47    | 0 (0)                                   | -    | -                                        | -    | 47                               | 100.0 |
| <b>Total</b>                                  | 59                                                  | 30   | 47 | 136   | 20                                      | 14.7 | 17                                       | 12.5 | 99                               | 72.8  |

**Note:** <sup>1</sup> classification of hepatic fibrosis based on Ohmae et al. (1992); **Abbreviations:** US-detectable hepatic fibrosis types 0 (T0), 1/2 (T1/2), and 3 (T3)

**Supplementary Table S3.** Dynamics of US-detectable hepatic fibrosis severity at baseline and at 12 months after PZQ treatment among the 136 patients enrolled in the cohort.

| Hepatic<br>fibrosis,<br>baseline <sup>1</sup> | Hepatic<br>fibrosis,<br>after 12<br>months <sup>1</sup> |      |    | Total | Regression<br>of Fibrosis<br>Grade (RF) |      | Progression<br>of Fibrosis<br>Grade (PF) |      | Stable<br>Fibrosis<br>Grade (SF) |       |
|-----------------------------------------------|---------------------------------------------------------|------|----|-------|-----------------------------------------|------|------------------------------------------|------|----------------------------------|-------|
|                                               | T0                                                      | T1/2 | T3 |       | no.                                     | %    | no.                                      | (%)  | no.                              | (%)   |
| T0                                            | 52                                                      | 6    | 0  | 58    | -                                       | -    | 6                                        | 10.3 | 52                               | 89.7  |
| T1/2                                          | 10                                                      | 19   | 2  | 31    | 10                                      | 32.3 | 2                                        | 6.4  | 19                               | 61.3  |
| T3                                            | 0                                                       | 0    | 47 | 47    | 0 (0)                                   | -    | -                                        | -    | 47                               | 100.0 |
| <b>Total</b>                                  | 62                                                      | 25   | 49 | 136   | 20                                      | 14.7 | 17                                       | 12.5 | 99                               | 72.8  |

**Note:** <sup>1</sup> classification of hepatic fibrosis based on Ohmae et al. (1992); **Abbreviations:** US-detectable hepatic fibrosis types 0 (T0), 1/2 (T1/2), and 3 (T3)

**Supplementary Table S4.** Dynamics of US-detectable hepatic fibrosis severity at baseline and at 24 months after PZQ treatment among the 136 patients enrolled in the cohort.

| Hepatic<br>fibrosis,<br>baseline <sup>1</sup> | Hepatic<br>fibrosis,<br>after 24<br>months <sup>1</sup> |      |    | Total | Regression<br>of Fibrosis<br>Grade (RF) |      | Progression<br>of Fibrosis<br>Grade (PF) |      | Stable<br>Fibrosis<br>Grade (SF) |       |
|-----------------------------------------------|---------------------------------------------------------|------|----|-------|-----------------------------------------|------|------------------------------------------|------|----------------------------------|-------|
|                                               | T0                                                      | T1/2 | T3 |       | no.                                     | %    | no.                                      | (%)  | no.                              | (%)   |
| T0                                            | 46                                                      | 12   | 0  | 58    | -                                       | -    | 12                                       | 20.7 | 46                               | 79.3  |
| T1/2                                          | 20                                                      | 6    | 5  | 31    | 20                                      | 64.5 | 5                                        | 16.1 | 6                                | 19.4  |
| T3                                            | 0                                                       | 0    | 47 | 47    | 0 (0)                                   | -    | -                                        | -    | 47                               | 100.0 |
| <b>Total</b>                                  | 66                                                      | 18   | 52 | 136   | 20                                      | 14.7 | 17                                       | 12.5 | 99                               | 72.8  |

**Note:** <sup>1</sup> classification of hepatic fibrosis based on Ohmae et al. (1992); **Abbreviations:** US-detectable hepatic fibrosis types 0 (T0), 1/2 (T1/2), and 3 (T3)

**Supplementary Table S5.** Fold change of the 19 differentially expressed miRNAs in the pooled sera of chronic schistosomiasis patients with different degrees of hepatic fibrosis (Sj+/T1–3, *n* = 8) and non-infected participants without hepatic fibrosis (Sj–/T0, *n* = 8) using chronic schistosomiasis patients without hepatic fibrosis (Sj+/T0, *n* = 8) as comparator.

| miRNA              | Fold Change (FC) <sup>1,2,3</sup> |        |
|--------------------|-----------------------------------|--------|
|                    | Sj+/T1–3                          | Sj–/T0 |
| <b>miR-93-5p</b>   | 21.56                             | 15.03  |
| miR-27b-3p         | 15.67                             | ND     |
| miR-24-3p          | 12.04                             | 2.30   |
| miR-27a-3p         | 10.34                             | 0.25   |
| miR-30b-5p         | 9.45                              | ND     |
| miR-16-5p          | 6.77                              | 0.03   |
| miR-30a-5p         | 6.50                              | 0.37   |
| miR-25-3p          | 5.82                              | 0.00   |
| miR-30e-5p         | 5.24                              | 0.19   |
| miR-425-5p         | 4.59                              | 0.01   |
| let-7g-5p          | 4.53                              | 0.18   |
| let-7i-5p          | 4.44                              | 0.01   |
| miR-21-5p          | 4.32                              | 0.19   |
| <b>miR-200b-3p</b> | 4.00                              | 2.07   |
| <b>miR-150-5p</b>  | 0.35                              | 0.02   |
| miR-151a-5p        | 0.33                              | 0.01   |
| <b>let-7a-5p</b>   | 0.22                              | 0.00   |
| <b>miR-146a-5p</b> | 0.22                              | 0.43   |
| <b>miR-122-5p</b>  | 0.18                              | 0.21   |

**Note:** <sup>1</sup> chronic schistosomiasis patients without hepatic fibrosis were used as comparator, <sup>2</sup> results are shown for miRNAs that had significant FC  $\geq 2$  or  $\leq 0.5$ , <sup>3</sup> miRNAs in bold face were individually validated

## Supplementary Figures

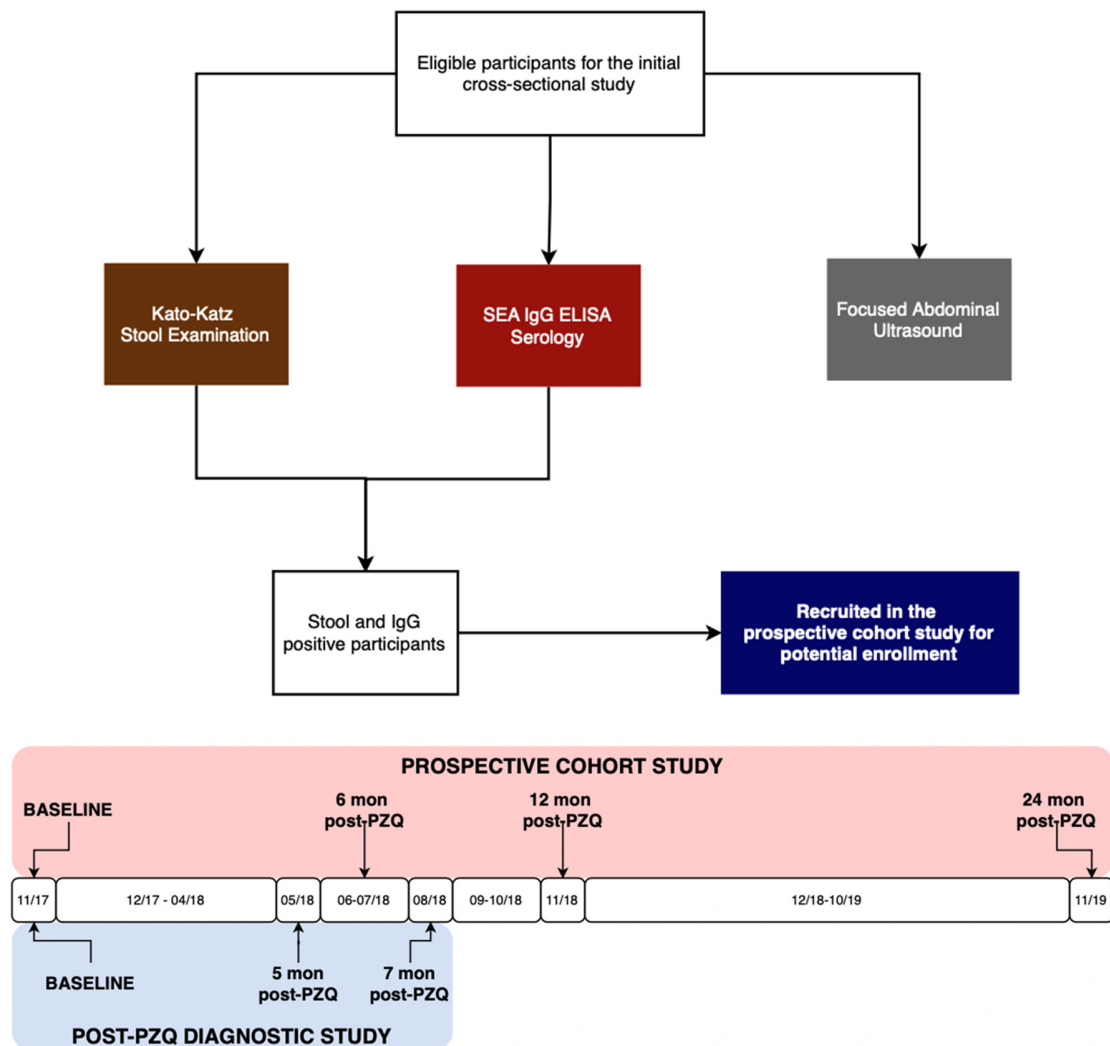

**Supplementary Figure S1.** Workflow for the prospective cohort study. **Abbreviations:** Praziquantel (PZQ), soluble egg antigen (SEA), Immunoglobulin G (IgG).

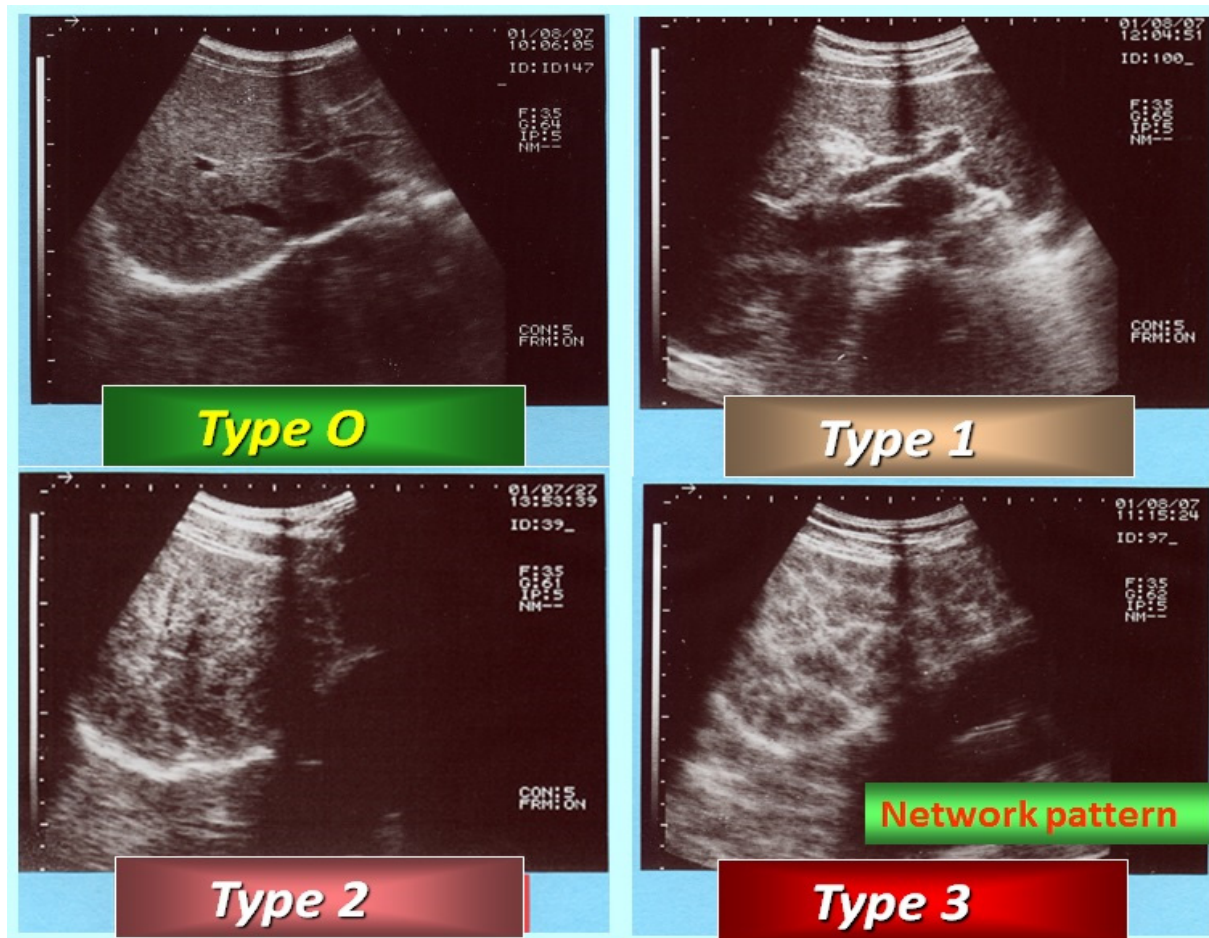

**Supplementary Figure S2.** Ohmae et al. (1992) US-based hepatic fibrosis severity. Images were obtained from Dr. Yuichi Chigusa and used with permission.



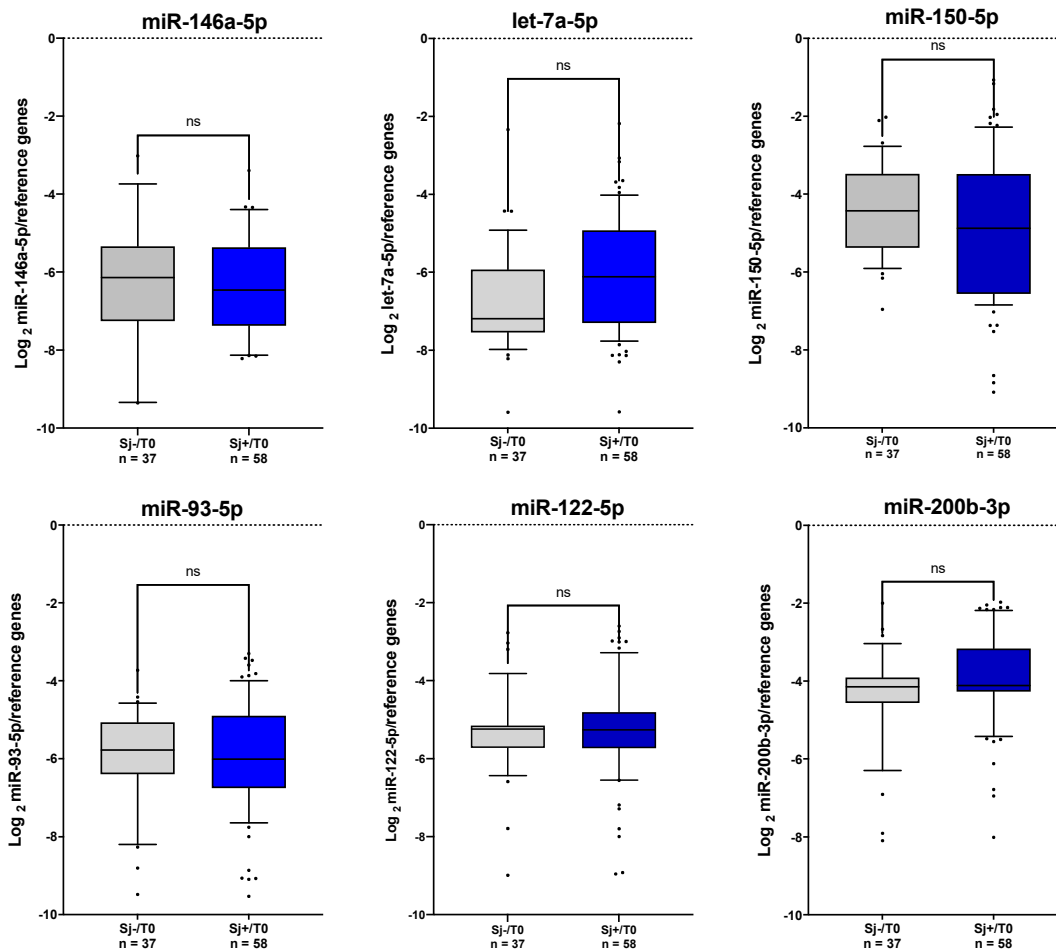

**Supplementary Figure S3.** Differentiation of participants with (Sj+/T0,  $n = 37$ ) and without (Sj-/T0,  $n = 58$ ) active schistosomiasis by serum levels of the six target miRNAs.

**Note:** Values were normalized using the average of the endogenous SNORD95 and the spiked-in UniSp6 reference miRNAs. The boxes represent the interquartile range, while the lines across the boxes indicate the median value. The hash marks above and below the boxes show the 90<sup>th</sup> and 10<sup>th</sup> percentiles for each group, respectively. Data were checked for normality and lognormality. Mann-Whitney test was used (ns – no significant difference).

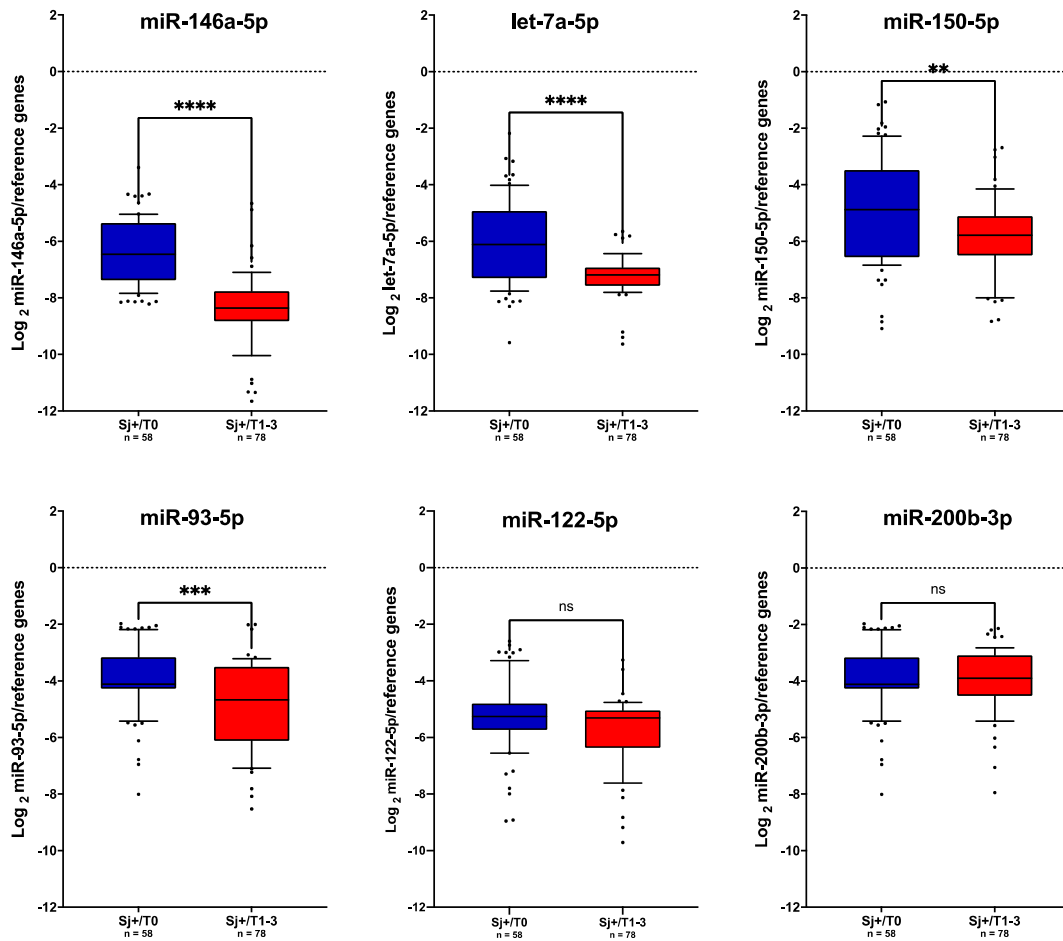

**Supplementary Figure S4.** Differentiation of chronic schistosomiasis patients with (Sj+/T1-3,  $n = 78$ ) and without (Sj+/T0,  $n = 58$ ) hepatic fibrosis by serum levels of the six target miRNAs.

**Note:** Values were normalized using the average of the endogenous SNORD95 and the spiked-in UniSp6 reference miRNAs. The boxes represent the interquartile range, while the lines across the boxes indicate the median value. The hash marks above and below the boxes show the 90<sup>th</sup> and 10<sup>th</sup> percentiles for each group, respectively. Data were checked for normality and lognormality. Mann-Whitney test was used (ns – no significant difference, \*\*  $p < 0.01$ , \*\*\*  $p < 0.001$ , and \*\*\*\*  $p < 0.0001$ ).

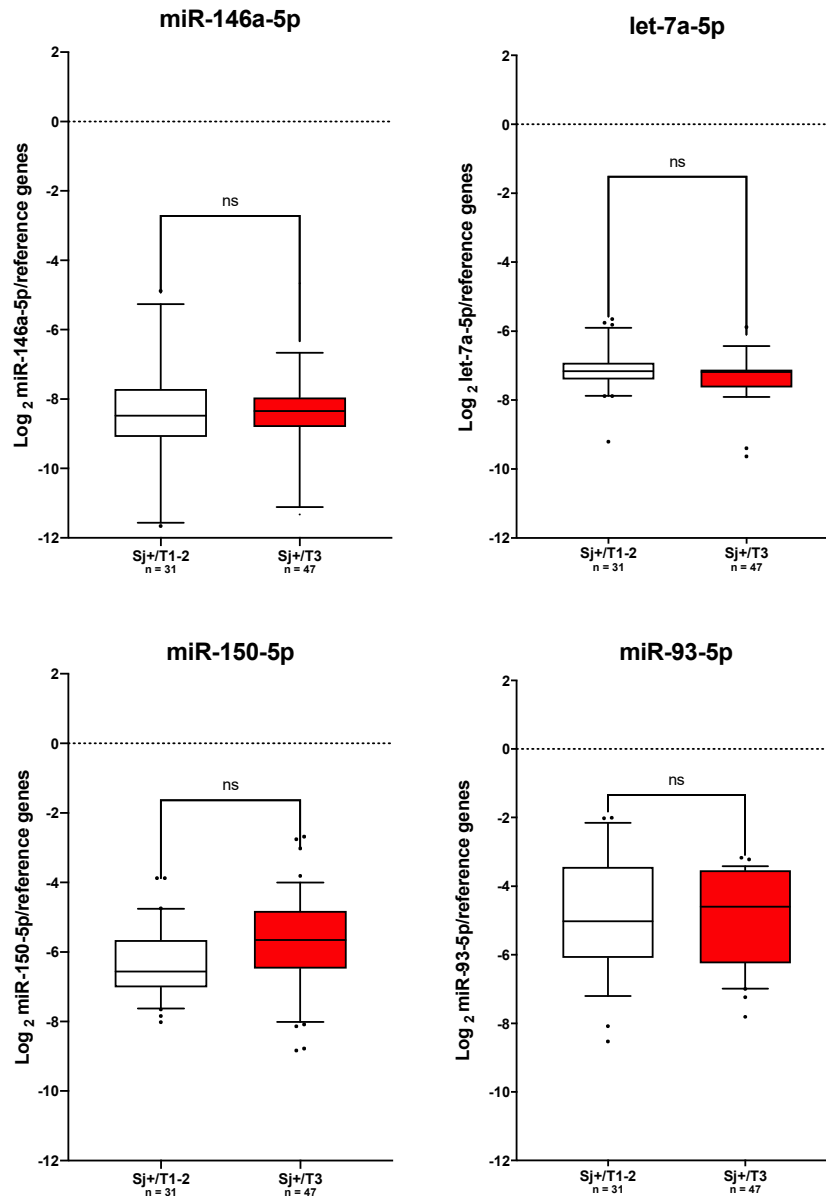

**Supplementary Figure S5.** Differentiation of chronic schistosomiasis patients with mild (Sj+/T1-2,  $n = 31$ ) and severe (Sj+/T3,  $n = 47$ ) hepatic fibrosis by serum levels of the target miRNAs.

**Note:** Values were normalized using the average of the endogenous SNORD95 and the spiked-in UniSp6 reference miRNAs. The boxes represent the interquartile range, while the lines across the boxes indicate the median value. The hash marks above and below the boxes show the 90<sup>th</sup> and 10<sup>th</sup> percentiles for each group, respectively. Data were checked for normality and lognormality. Mann-Whitney test was used (ns – no significant difference).

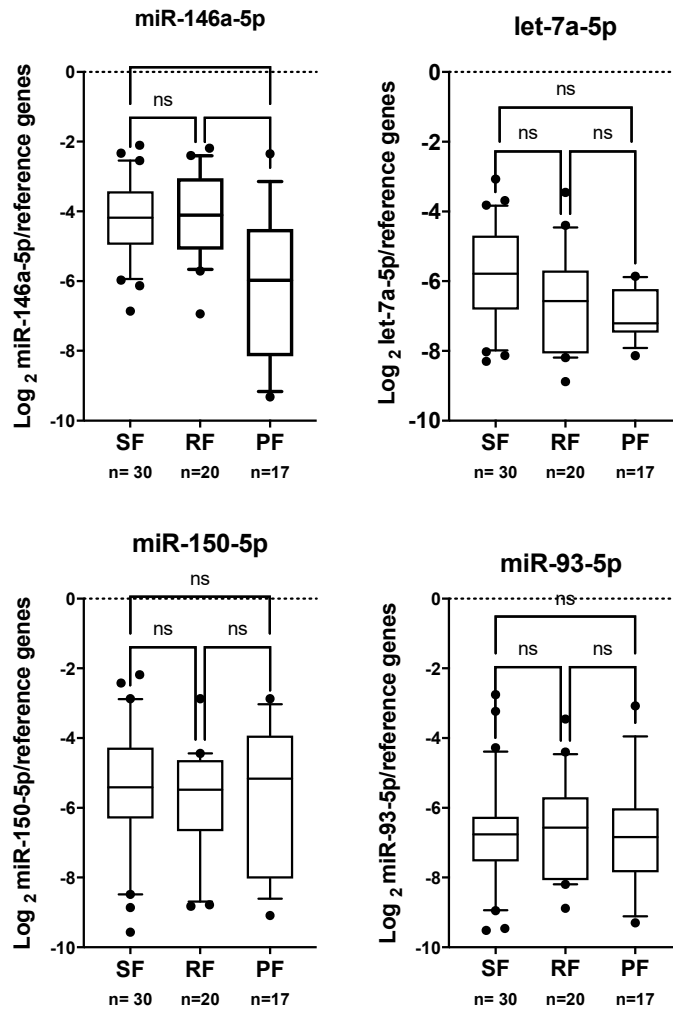

**Supplementary Figure S6.** Differentiation of patients with stable US findings (SF,  $n = 30$ ), reversal of fibrosis (RF,  $n = 20$ ), and progressive fibrosis (PF,  $n = 17$ ) by baseline serum levels of the 6 target miRNAs.

**Note:** Values were normalized using the average of the endogenous SNORD95 and the spiked-in UniSp6 reference miRNAs. The boxes represent the interquartile range while the lines across the boxes indicate median value. The hash marks above and below the boxes show the 90<sup>th</sup> and 10<sup>th</sup> percentiles for each group, respectively. Data were checked for normality and lognormality. Ordinary one-way ANOVA with either Kruskal-Wallis (non-parametric) or Brown-Forsythe (parametric with unequal variance) tests was used (ns – no significant difference)
